# Supplementary material for: Dihydrocapsaicin Inhibits Epithelial Cell Transformation through Targeting Amino Acid Signaling and c-Fos Expression
Source: PubMed Central journal article supplement (PMC6627986; doi:10.3390/nu11061269), 2019-06-04
Supplement: nutrients-11-01269-s001.pdf [file nutrients-11-01269-s001.pdf]

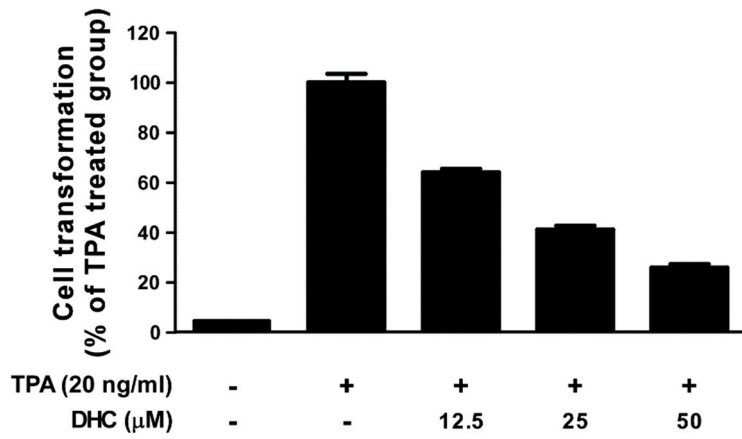

Figure S1. DHC inhibits TPA-induced cell transformation.

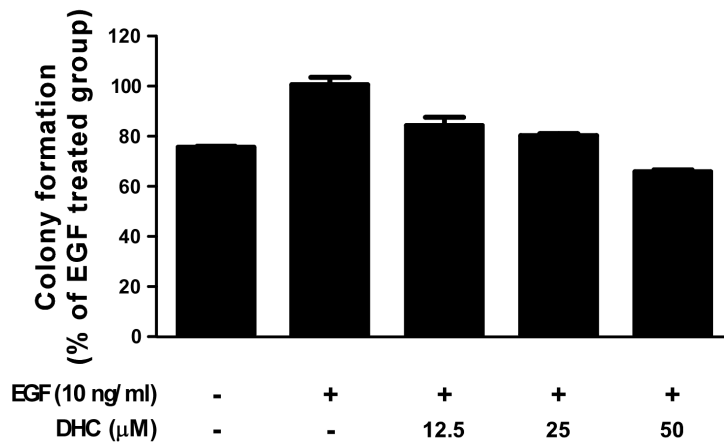

Figure S2. DHC inhibits colony formation.

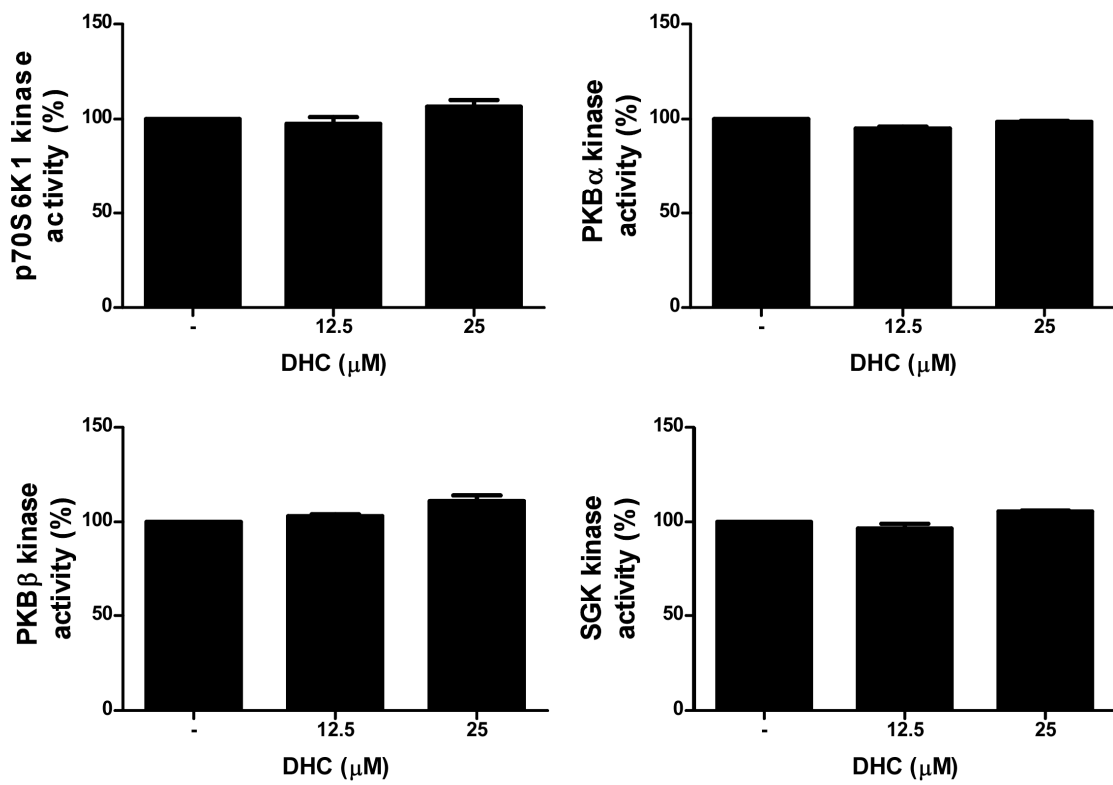

Figure S3. Effect of DHC on p70S6K1, PKB, and SGK kinase activity in vitro.
